# Supplementary material for: Australian Bushfire Emissions Result in Enhanced Polar Stratospheric Ice Clouds
Source: Copernicus journal article supplement (doi:10.5194/egusphere-2024-1849), 2024-07-08
Supplement: Supplementary file 1 [file egusphere-2024-1849-supplement.pdf]

## Supplementary

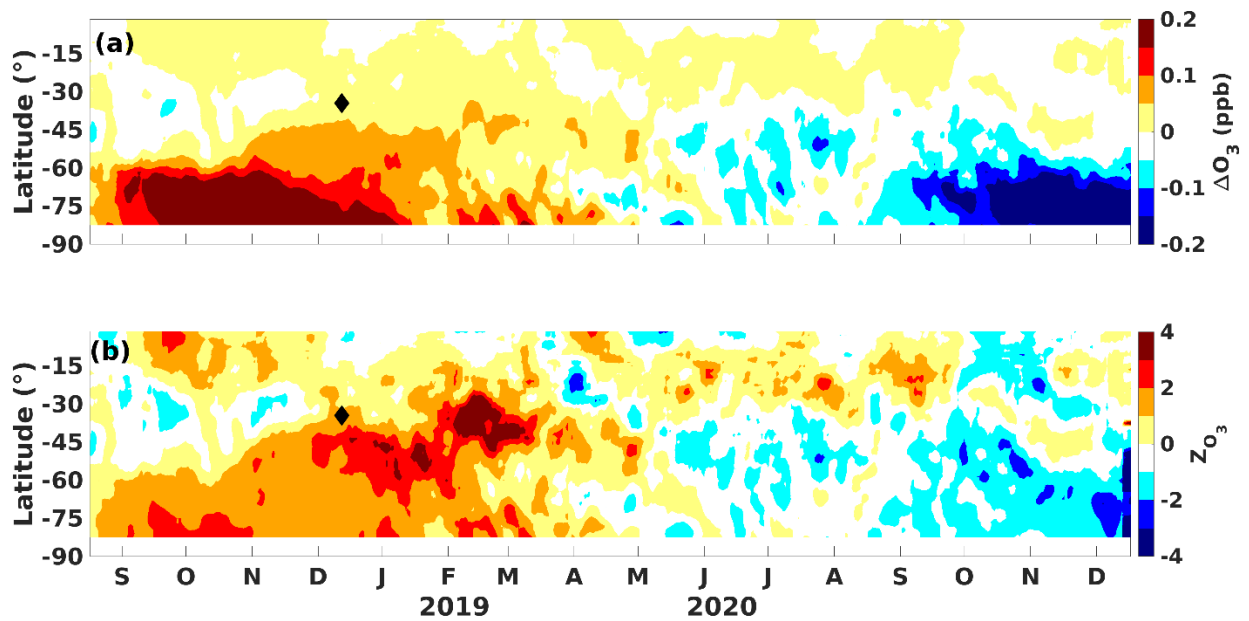

Figure S1. (a) Daily zonal mean anomaly ( $\Delta$ ) in MLS Ozone ( $O_3$ ) mixing ratio, and (b) corresponding standardized anomaly ( $Z$ ) at the altitude of 15 km from September 2019 to December 2020 are shown. The x-ticks mark the middle of each month. The black diamond in each plot marks the black summer event.

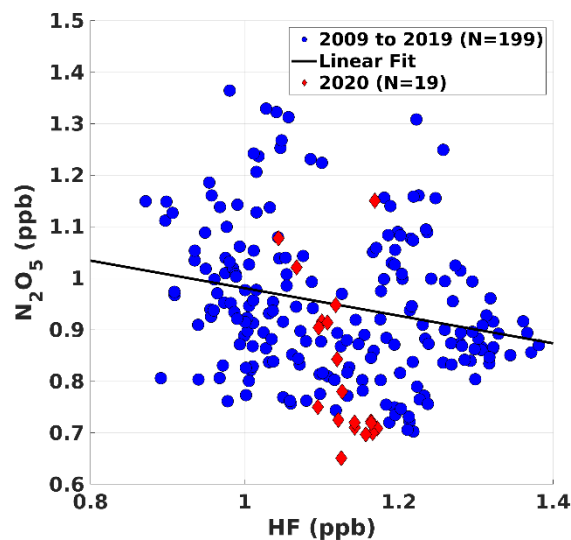

Figure S2. Tracer-Tracer correlation analysis between ACE-FTS HF and  $N_2O_5$  for the altitude of 25 km is shown.
